# Supplementary material for: Effects of Peptide C12-OOWW-NH2 on Transcriptome and Cell Wall of the Postharvest Fungal Pathogen Penicillium digitatum
Source: Front Microbiol. 2020 Sep 17;11:574882. doi: 10.3389/fmicb.2020.574882 (PMC7527529; doi:10.3389/fmicb.2020.574882)
Supplement: TABLE S3 — The significant enrichment terms in the groups of C2 VS C12O3TR2. [file Table_3.XLSX]

## Sheet: Sheet2
Table S3. The significant enrichment terms in the groups of C2 VS C12O3TR2.
Term type	GO accession	GO term	padj
Biological process (BP)	GO:0043603	cellular amide metabolic process	2.5×10-2
	GO:0043604	amide biosynthetic process	2.5×10-2
	GO:0044267	cellular protein metabolic process	2.5×10-2
	GO:0043043	peptide biosynthetic process	2.5×10-2
	GO:0006518	peptide metabolic process	2.5×10-2
	GO:0006412	translation	2.5×10-2
	GO:0019538	protein metabolic process	4.9×10-2
Cellular component (CC)	GO:1990904	ribonucleo protein complex	5.74×10-6
	GO:0005840	ribosome	5.74×10-6
	GO:0005737	cytoplasm	1.07×10-2
	GO:0044444	cytoplasmic part	1.07×10-2
	GO:0043228	non-membrane-bounded organelle	1.07×10-2
	GO:0043232	intracellular non-membrane-bounded organelle	1.07×10-2
Molecular function(MF)	GO:0003735	structural constituent of ribosome	8.53×10-6
	GO:0005198	structural molecule activity	8.53×10-6
